# Supplementary material for: The MAP Kinase SsKpp2 Is Required for Mating/Filamentation in Sporisorium scitamineum
Source: PubMed Central journal article supplement (PMC6212578; doi:10.3389/fmicb.2018.02555), 2018-10-26
Supplement: Data_Sheet_1.pdf [file Data_Sheet_1.pdf]

Supplementary Information

**The MAP kinase SsKpp2 is required for mating/filamentation in *Sporisorium*  
*scitamineum***

Yi Zhen Deng<sup>1</sup>, Bin Zhang, Changqing Chang, Yixu Wang, Shan Lu, Sun Shuquan,  
Xiaomeng Zhang, Baoshan Chen, Zide Jiang<sup>1</sup>

1. To whom correspondence should be addressed. Email: [zdjiang@scau.edu.cn](mailto:zdjiang@scau.edu.cn) (Z  
Jiang) or [dengyz@scau.edu.cn](mailto:dengyz@scau.edu.cn) (YZ Deng).

**This PDF file includes**

Figures and Table

**Figure S1 Generation and verification of *sskpp2*Δ mutants.** (A) schematic representation of *S. scitamineum* *SsKPP2* locus (*SPSC\_04357*) drawn to scale, wherein, open arrowed bars represent coding region (and its orientation) and dashed lines denote the homologous region constructed flanking the hygromycin-resistance cassette (*HPT*). The solid line labelled with “probe” denotes the location and length of the DNA fragment used as a probe to verify the transformants by Southern blot as shown in (B). Distribution of restriction enzyme *XhoI* in the genomic region outside the homologous regions (solid line), or in *HPT* gene, was indicated. Scale bar = 1 kb. (B) Southern blot analysis to confirm *SsKPP2* deletion. Genomic DNA from wild type (WT) or transformants from two mating-type background (*MAT-1* and *MAT-2*) was digested with *XhoI*, and then probed with the probe fragment as indicated in (A). Detection of the *HPT* gene fragment of expected size (2 kb) was diagnostic as deletion mutants. (C) The *sskpp2*Δ mutants (K17-10 and K18-5) in two mating-type backgrounds (*MAT-1* and *MAT-2*) were confirmed by Semiquantitative RT-PCR using gene-specific primers of the *SsKPP2*. Relative gene expression level was calculated with  $-\Delta\Delta C_t$  method (Livak & Schmittgen, 2001) with *ACTIN* as internal control. All primers were listed in Table S2 or Table S3.

# Figure S1

## A

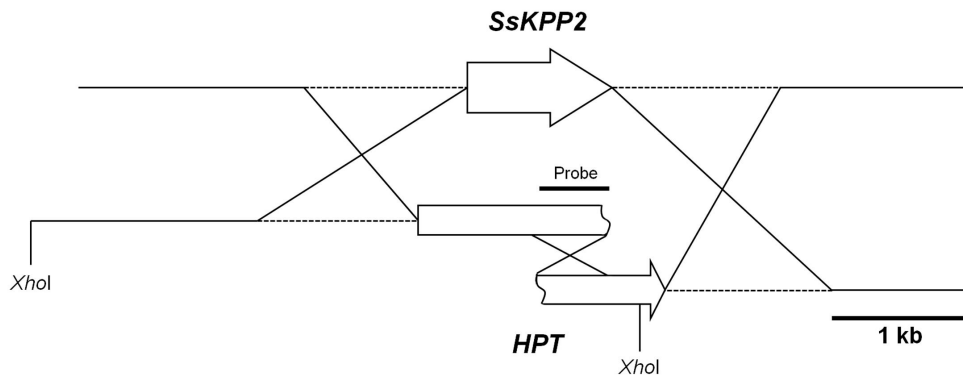

## B

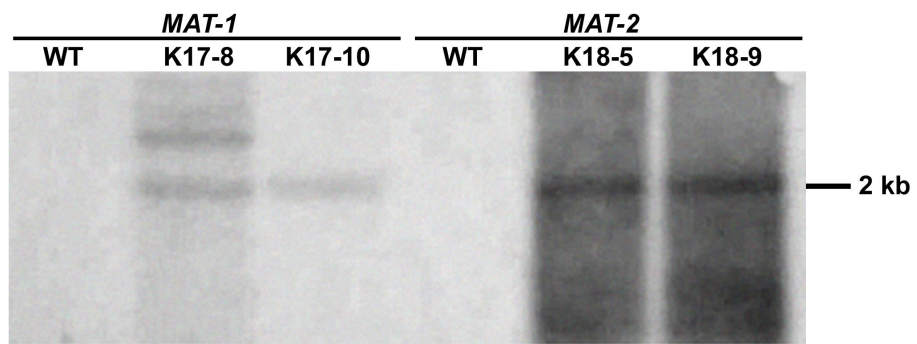

## C

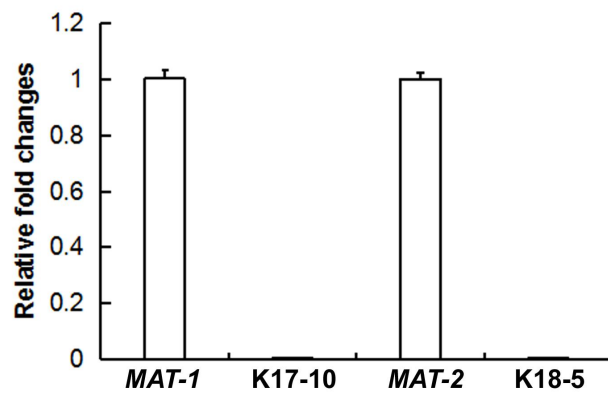

**Figure S2 Generation and verification of *tyna-1*Δ and *tyna-2*Δ mutants. (A)**

Schematic illustration of *S. scitamineum* *TYNA1* or *TYNA2* locus (labelled as *TYNA1/2*), not draw to scale. Open bars represent coding region of targeted gene and dashed lines denote the homologous region constructed flanking the hygromycin-resistance cassette (*HPT*). The genomic fragment outside the homologous region was represented as solid line. The arrows denote to the position of the primers used to verify the transformants as shown in (B) and their DNA sequences were listed in Table S1. (B) Verification of *tyna-1*Δ or *tyna-2*Δ mutant by PCR amplification. Genomic DNA from the wild-type *MAT-1* or *MAT-2*, and the transformants in these two mating-type background (+ represents in *MAT-1* background, and - in *MAT-2* background) was PCR amplified using the primers as denoted in (A) to verify the deletion of *TYNA-1* or *TYNA-2* coding region. Amplification with the wild-type specific primers *TYNA1/2-F*+*TYNA1/2-R*, reflected the presence of intact gene *TYNA-1* or *TYNA-2* in *MAT-1* or *MAT-2* strains; while amplification with the wild-type locus primer *TYNA1/2-F* combined with *HPT* specific primer *HPT-R*, was diagnostic as successful deletion of target gene. (C) The *tyna-1*Δ or *tyna-2*Δ mutants in the indicative mating-type background were confirmed by Semiquantitative RT-PCR using gene-specific primers as listed in Table S2. Relative gene expression level was calculated with  $-\Delta\Delta C_t$  method (Livak & Schmittgen, 2001) with *ACTIN* as internal control.

**Figure S2**

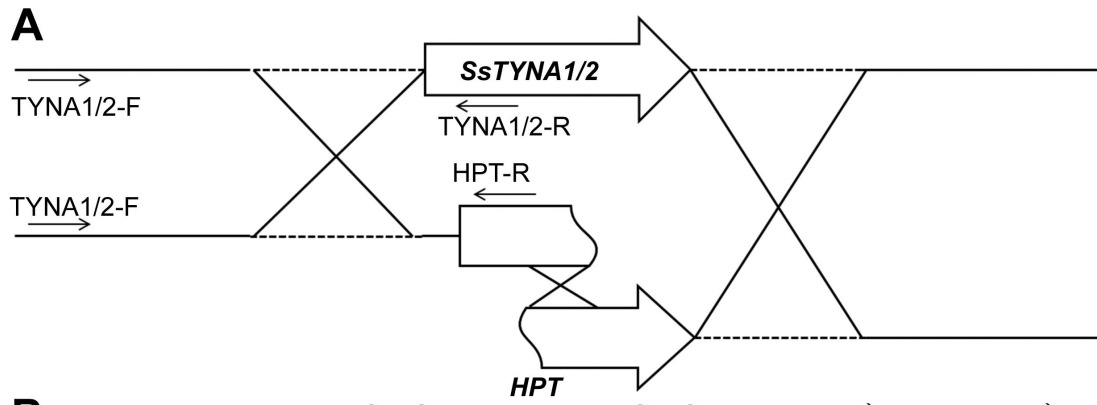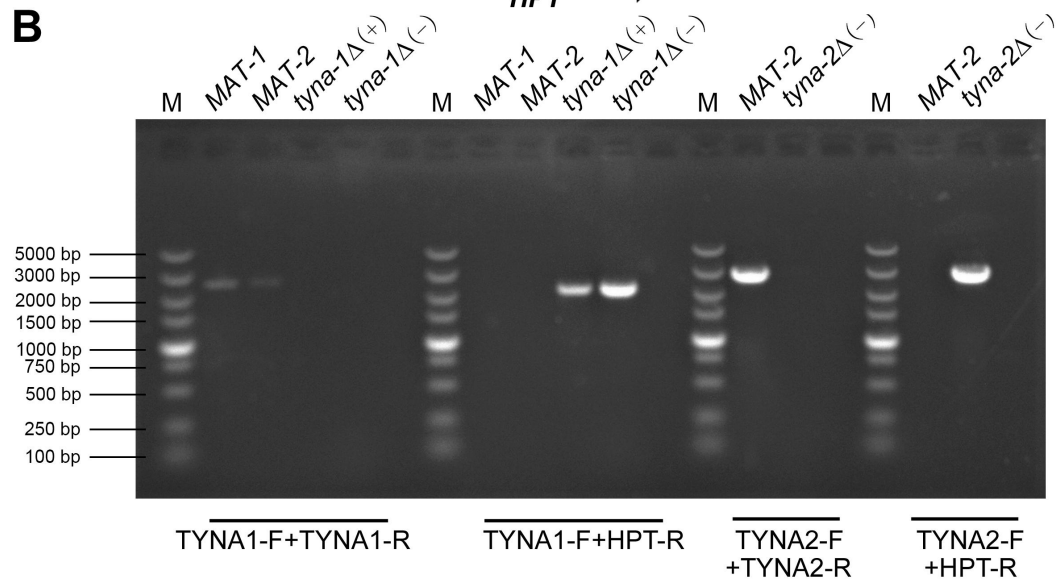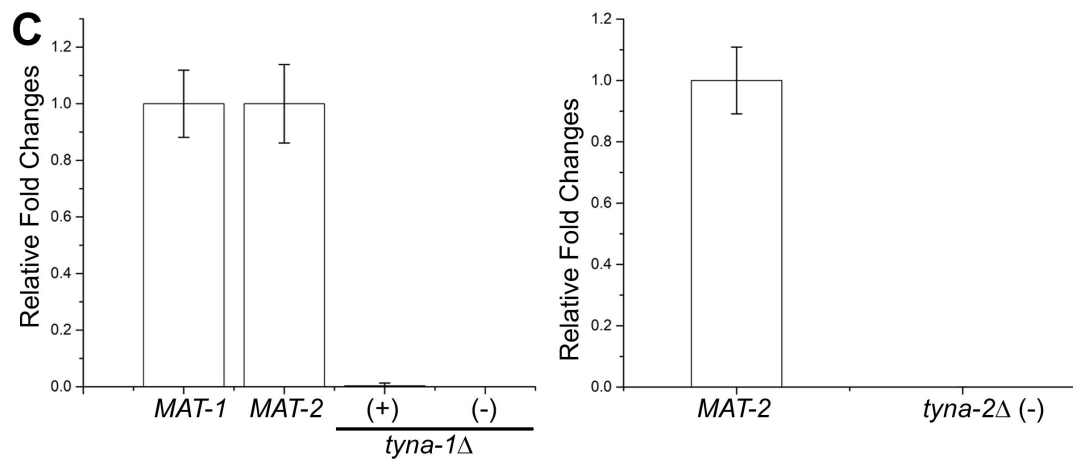

**Table S1. Selected genes for transcriptional profiling between WT and *sskpp2Δ*.**

| Gene number                             | Gene name     | Sequences of qPCR primers              |
|-----------------------------------------|---------------|----------------------------------------|
| GenBank:<br>CP010914.1<br>857085-857204 | <i>MFA1</i>   | MFA1-For: 5'-ATGCTTTCCATCTTTACCCAGA-3' |
|                                         |               | MFA1-Rev: 5'-GTGCAGCTAGAGTAGCCAAG-3'   |
| GenBank:<br>LK056662.1<br>794925-795044 | <i>MFA2</i>   | MFA2-For: 5'-CGTCCAGGCCATTGTTTCT-3'    |
|                                         |               | MFA2-Rev: 5'-TAGGCCACGGTGCAGTA-3'      |
| GenBank:<br>CP010914.1<br>859744-860179 | <i>PRA1</i>   | PRA1-For: 5'-GGACGCTATCACCCAATCTTAC-3' |
|                                         |               | PRA1-Rev: 5'-TCTCCAACATGGCAACACTC-3'   |
| SPSC_01805                              | <i>PRA2</i>   | PRA2-For: 5'-GAAGAGCCTCAGCCGTTATAC-3'  |
|                                         |               | PRA2-Rev: 5'-GGGTTCCCTTACTGAACCTTAG-3' |
| GenBank:<br>CP010914.1<br>794193-795534 | <i>bE1</i>    | bE1-For: 5'-CCAACGACGAAAGCGCGACG -3'   |
|                                         |               | bE1-Rev: 5'-GACTCTCTGCGAGCGGGCAT-3'    |
| SPSC_01827                              | <i>bE2</i>    | bE2-For: 5'-CCCGACACTCAGCGCCAAGA-3'    |
|                                         |               | bE2-Rev: 5'-TCGACCTGCGTGCGTGAACA-3'    |
| GenBank:<br>CP010914.1<br>796524-797778 | <i>bW1</i>    | bW1-For: 5'-CGAGAAAGGCACACAACGTC-3'    |
|                                         |               | bW1-Rev: 5'-CACCTTTTGGGGAGTTCCGA-3'    |
| SPSC_01826                              | <i>bW2</i>    | bW2-For: 5'-TGTTGATGAGCCAGTGCCTT-3'    |
|                                         |               | bW2-Rev: 5'-AGTTCCGACTGGCTGAAGTG-3'    |
| SSCI14340.1                             | <i>PRF1</i>   | PRF1-For: 5'-GCCACCTCAGCCGTCTATCG-3'   |
|                                         |               | PRF1-Rev: 5'-ACTCGCAGTAGCCTTGCTCG-3'   |
| SPSC_03059                              | <i>ARO8</i>   | ARO8-For: 5'-CCTGGTGTGCGTTCATTCC-3'    |
|                                         |               | ARO8-Rev: 5'-CAAGCTCGGGCATCGTCTTA-3'   |
| SPSC_00463                              | <i>ARO9</i>   | ARO9-For: 5'-TCCGCACGAACCATCCTAAC-3'   |
|                                         |               | ARO9-Rev: 5'-AGGTCTGAATGAGTCGCCTTG-3'  |
| SPSC_03401                              | <i>DC</i>     | DC-For: 5'-TGGAGGACCATTGTTGACCG-3'     |
|                                         |               | DC-Rev: 5'-CATCGAAGGCTTCCGCAAAG-3'     |
| SPSC_00335                              | <i>TYNA-1</i> | TYNA-1 For: 5'-ACCAGTCCAACGGTAAGCAG-3' |
|                                         |               | TYNA-1 Rev: 5'-TCTCCCAGAAATCGTTGGGC-3' |

|             |                |                                        |
|-------------|----------------|----------------------------------------|
| SPSC_00449  | <i>TYNA-2</i>  | TYNA-2 For: 5'-AAGGTAACTCTGCCGCTCC-3'  |
|             |                | TYNA-2 Rev: 5'-GCTAATACCATGCCTCGGCT-3' |
| SSCI56010.1 | <i>BNA1</i>    | BNA1-For: 5'-GTGTTTGCGAATCGAACGGG-3'   |
|             |                | BNA1-Rev: 5'-GGTGATTGACGAGGATGGCA-3'   |
| SSCI63670.1 | <i>BNA4-1</i>  | BNA4-1 For: 5'-CCAAGCGGCTCCATGTTGCG-3' |
|             |                | BNA4-1 Rev: 5'-TCTCATGCTCGCCTCGTCGC-3' |
| SPSC_06049  | <i>BNA4-2</i>  | BNA4-2 For: 5'-TGTGCATGTCTTGACGGTGA-3' |
|             |                | BNA4-2 Rev: 5'-AATGGCTTCACGACTGGGAG-3' |
| SPSC_00684  | <i>BNA5-2</i>  | BNA5-2 For: 5'-CAGGAGGAAGCTAAAGAGGC-3' |
|             |                | BNA5-2 Rev: 5'-CAACCCCTCTGCTTTTCGG-3'  |
| SSCI48940.1 | <i>BNA7-1</i>  | BNA7-1 For: 5'-ATTCGGTCTCAAGCCTGCTC-3' |
|             |                | BNA7-1 Rev: 5'-AGAGCAGTTCATCGTCTCGC-3' |
| SSCI27490.1 | <i>BNA7-2</i>  | BNA7-2 For: 5'-CGAGGGTACGTACTTTGCCA-3' |
|             |                | BNA7-2 Rev: 5'-GCGTCGGGAAAATGTGGTG-3'  |
| SPSC_04512  | <i>ACTIN</i> * | Actin-For: 5'-CAGCTCGATGAAGGTCAAGAT-3' |
|             |                | Actin-Rev: 5'-CACATCTGCTGGAAGGTAGAG-3' |

\* *ACTIN* gene is used as internal control.

**Table S2 List of primers used for targeted gene deletion and verification.**

| Name                | Primer sequences                              | Description           |
|---------------------|-----------------------------------------------|-----------------------|
| <i>pEX2-HPT-For</i> | 5'-GCAAGACCTGCCTGAAACCG-3'                    | Deletion construction |
| <i>pEX2-HPT-Rev</i> | 5'-GGTCAAGACCAATGCGGAGC-3'                    |                       |
| <i>Kpp2-1For</i>    | 5'-GAGATTCCGATAGGCGAGAG-3'                    |                       |
| <i>Kpp2-1Rev</i>    | 5'-GCCTATCAGCAAGATCTCGATGCTGTCTTGTGAGATG-3'   |                       |
| <i>Kpp2-2For</i>    | 5'-CATCTCACAAGACAGCATCGAGATCTTGCTGATAGGC-3'   |                       |
| <i>Kpp2-2Rev</i>    | 5'-ACAATCATAAGGAAGCATCCTAATTCGGGGGATCTGGAT-3' |                       |
| <i>Kpp2-3For</i>    | 5'-ATCCAGATCCCCCGAATTAGGATGCTTCCTTAGATTGT-3'  |                       |
| <i>Kpp2-3Rev</i>    | 5'-ATCCAGGGCTTCTTTGATAT-3'                    |                       |

|                           |                                              |                     |
|---------------------------|----------------------------------------------|---------------------|
| <i>TYNA1-1For</i>         | 5'-AGAAGCGTGCTACTCTATCAA-3'                  |                     |
| <i>TYNA1-1Rev</i>         | 5'-TTGCAAACCTTTGGCTCTGTTTCATCAGATCTTGCTGA-3' |                     |
| <i>TYNA1-2For</i>         | 5'-CTCTGTTTCATCAGATCTTGCTGATAGGCAGG-3'       |                     |
| <i>TYNA1-2Rev</i>         | 5'-TTTGCATTCCGATAATTCGGGGGATCTGGAT-3'        |                     |
| <i>TYNA1-3For</i>         | 5'-TCCCCCGAATTATCGGAATGCAAACAAGCGTCATG-3'    |                     |
| <i>TYNA1-3Rev</i>         | 5'-AGACGTCGCTTCTGCGGAAACGCT-3'               |                     |
| <i>TYNA2-1For</i>         | 5'-TATCGCTCGTCCGCTTGATGAGTCG-3'              |                     |
| <i>TYNA2-1Rev</i>         | 5'-TCAGCAAGATCTCATGGCGAACTTGTGGGTAATGA-3'    |                     |
| <i>TYNA2-2For</i>         | 5'-AAGTTCGCCATGAGATCTTGCTGATAGGCAGG-3'       |                     |
| <i>TYNA2-2Rev</i>         | 5'-CATGACGATGCATAATTCGGGGGATCTGGAT-3'        |                     |
| <i>TYNA2-3For</i>         | 5'-TCCCCCGAATTATGCATCGTCATGACTACATTCTC-3'    |                     |
| <i>TYNA2-3Rev</i>         | 5'-TGATGGTGGCGAAGCTACTGGCG-3'                |                     |
| <i>Kpp2-For</i>           | 5'-ACAGCAGTCCAACCAGTC-3'                     |                     |
| <i>Kpp2-Rev</i>           | 5'-TTCTCAACCTTCTTCCTCTG-3'                   |                     |
| <i>TYNA1-For</i>          | 5'-GGTGTAGTTGTGGTGGATT-3'                    |                     |
| <i>TYNA1-Rev</i>          | 5'-CTTGACGGTGAACGAAGA-3'                     |                     |
| <i>TYNA2-For</i>          | 5'-GCTCTCCAACAGTCTCAAG-3'                    |                     |
| <i>TYNA2-Rev</i>          | 5'-ACCTCACAGTCTCGCATA-3'                     |                     |
| <i>HPT-For</i>            | 5'-CGCCATCGTCTTCTTCTT-3'                     |                     |
| <i>HPT-Rev</i>            | 5'-CGTCAGGACATTGTTGGA-3'                     |                     |
| <i>Kpp2-Probe-Forward</i> | 5'-ATCAGTCGATGGGAGGGAGGTAG-3'                | Southern blot probe |
| <i>Kpp2-Probe-Reverse</i> | 5'-TGAGGCTTGTGCGGCAGCGGGCC-3'                |                     |

**TableS3 List of primers used for qRT-PCR**

| Gene number                             | Gene name   | Sequences of qPCR primers             |
|-----------------------------------------|-------------|---------------------------------------|
| GenBank:<br>CP010914.1<br>857085-857204 | <i>MFA1</i> | MFA1-For: 5'-ATGCTTTCATCTTTACCCAGA-3' |
|                                         |             | MFA1-Rev: 5'-GTGCAGCTAGAGTAGCCAAG-3'  |
| GenBank:                                |             | MFA2-For: 5'-CGTCCAGGCCATTGTTTCT-3'   |



|                                         |               |                                        |
|-----------------------------------------|---------------|----------------------------------------|
| LK056662.1<br>794925-795044             | <i>MFA2</i>   | MFA2-Rev: 5'-TAGGCCACGGTGCAGTA-3'      |
| GenBank:<br>CP010914.1<br>859744-860179 | <i>PRA1</i>   | PRA1-For: 5'-GGACGCTATCACCCAATCTTAC-3' |
|                                         |               | PRA1-Rev: 5'-TCTCCAACATGGCAACACTC-3'   |
| SPSC_01805                              | <i>PRA2</i>   | PRA2-For: 5'-GAAGAGCCTCAGCCGTTATAC-3'  |
|                                         |               | PRA2-Rev: 5'-GGGTTCCCTTACTGAACCTTAG-3' |
| GenBank:<br>CP010914.1<br>794193-795534 | <i>bE1</i>    | bE1-For: 5'-CCAACGACGAAAGCGCGACG -3'   |
|                                         |               | bE1-Rev: 5'-GACTCTCTGCGAGCGGGCAT-3'    |
| SPSC_01827                              | <i>bE2</i>    | bE2-For: 5'-CCCGACACTCAGCGCCAAGA-3'    |
|                                         |               | bE2-Rev: 5'-TCGACCTGCGTGCGTGAACA-3'    |
| GenBank:<br>CP010914.1<br>796524-797778 | <i>bW1</i>    | bW1-For: 5'-CGAGAAAGGCACACAACGTC-3'    |
|                                         |               | bW1-Rev: 5'-CACCTTTTGGGGAGTTCCGA-3'    |
| SPSC_01826                              | <i>bW2</i>    | bW2-For: 5'-TGTTGATGAGCCAGTGCCTT-3'    |
|                                         |               | bW2-Rev: 5'-AGTTCCGACTGGCTGAAGTG-3'    |
| SPSC_03059                              | <i>ARO8</i>   | ARO8-For: 5'-CCTGGTGTGCGTTCATTCC-3'    |
|                                         |               | ARO8-Rev: 5'-CAAGCTCGGGCATCGTCTTA-3'   |
| SPSC_00463                              | <i>ARO9</i>   | ARO9-For: 5'-TCCGCACGAACCATCCTAAC-3'   |
|                                         |               | ARO9-Rev: 5'-AGGTCTGAATGAGTCGCCTTG-3'  |
| SPSC_03401                              | <i>DC</i>     | DC-For: 5'-TGGAGGACCATTGTTGACCG-3'     |
|                                         |               | DC-Rev: 5'-CATCGAAGGCTTCCGCAAAG-3'     |
| SPSC_00335                              | <i>TYNA-1</i> | TYNA-1 For: 5'-ACCAGTCCAACGGTAAGCAG-3' |
|                                         |               | TYNA-1 Rev: 5'-TCTCCCAGAAATCGTTGGGC-3' |
| SPSC_00449                              | <i>TYNA-2</i> | TYNA-2 For: 5'-AAGGTAACTCTGCCGCTCC-3'  |
|                                         |               | TYNA-2 Rev: 5'-GCTAATACCATGCCTCGGCT-3' |
| SSCI56010.1                             | <i>BNA1</i>   | BNA1-For: 5'-GTGTTTGCGAATCGAACGGG-3'   |
|                                         |               | BNA1-Rev: 5'-GGTGATTGACGAGGATGGCA-3'   |
| SSCI63670.1                             | <i>BNA4-1</i> | BNA4-1 For: 5'-CCAAGCGGCTCCATGTTGCG-3' |
|                                         |               | BNA4-1 Rev: 5'-TCTCATGCTCGCCTCGTCGC-3' |
|                                         | <i>BNA4-2</i> | BNA4-2 For: 5'-TGTGCATGTCTTGACGGTGA-3' |

|             |               |                                         |
|-------------|---------------|-----------------------------------------|
| SPSC_06049  |               | BNA4-2 Rev: 5'-AATGGCTTCACGACTGGGAG-3'  |
| SPSC_00684  | <i>BNA5-2</i> | BNA5-2 For: 5'-CAGGAGGAAGCTAAAGAGGC -3' |
|             |               | BNA5-2 Rev: 5'-CAACCCCCTCTGCTTTTCGG-3'  |
| SSCI48940.1 | <i>BNA7-1</i> | BNA7-1 For: 5'-ATTCGGTCTCAAGCCTGCTC-3'  |
|             |               | BNA7-1 Rev: 5'-AGAGCAGTTCATCGTCTCGC-3'  |
| SSCI27490.1 | <i>BNA7-2</i> | BNA7-2 For: 5'-CGAGGGTACGTACTTTGCCA-3'  |
|             |               | BNA7-2 Rev: 5'-GCGTCGGGAAAAATGTGGTG-3'  |
| SPSC_04512  | <i>ACTIN</i>  | Actin-For: 5'-CAGCTCGATGAAGGTCAAGAT-3'  |
|             |               | Actin-Rev: 5'-CACATCTGCTGGAAGGTAGAG-3'  |
